# Supplementary material
Source: publisher site journal article supplement (https://www.spandidos-publications.com/6718/downloadSupplementary)

Figure S1. Effect of chemotherapeutic agents and retinoids on AGS and NCI-N87 cell viability. Dose-response curves after MTT assay of both cell lines treated for 48 h with (A) cisplatin, (B) doxorubicin, (C) ATRA and (D) Fen. Dose response curves after sulforhodamine assay of both cell lines treated for 48 h with (E) ATRA and (F) Fen. Values are presented as the mean  $\pm$  standard error of three independent experiments performed in triplicate. ATRA, all-trans retinoic acid; Fen, fenretinide.

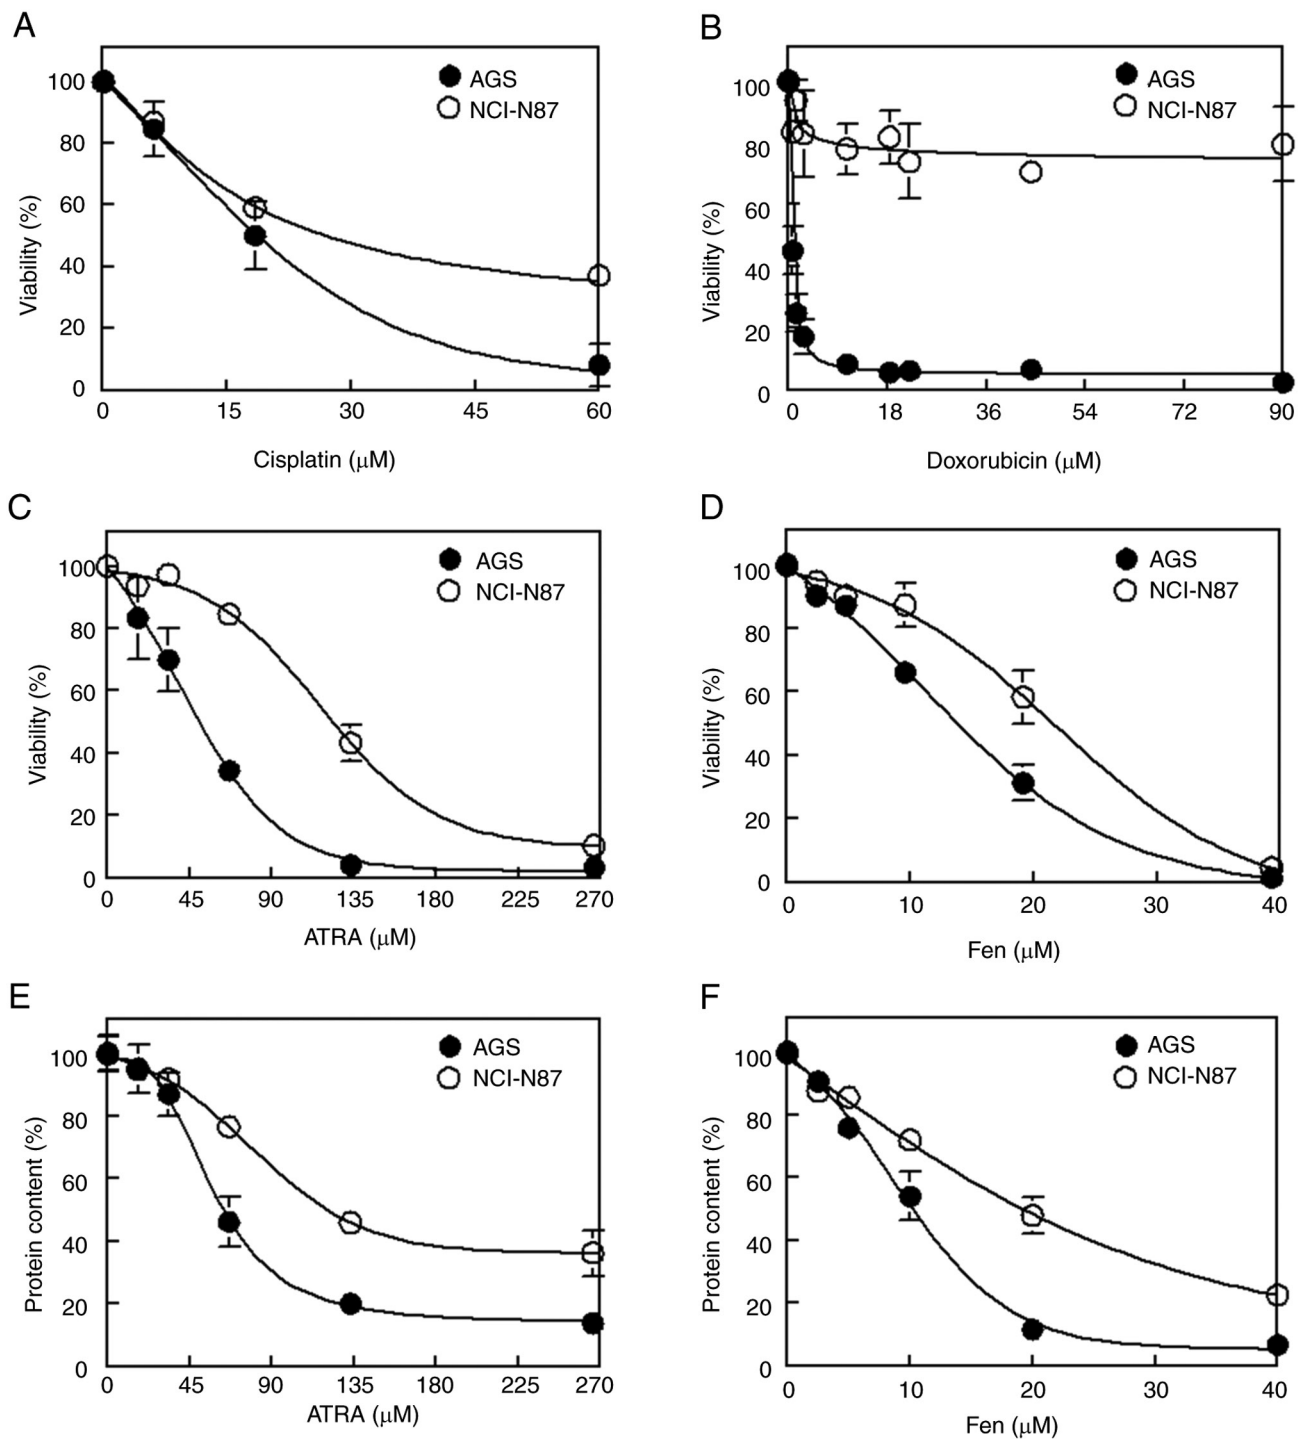

Supplement: Supplementary file 1 [file downloadSupplementary]
